# Supplementary material
Source: ML conference proceedings conference paper supplement (https://openaccess.thecvf.com/content/CVPR2021/html/Ge_Video_Object_Segmentation_CVPR_2021_paper.html)
Supplement: Supplementary file 1 [file Ge_Video_Object_Segmentation_CVPR_2021_supplemental.pdf]

# Supplemental Materials on Video Object Segmentation Using Global and Instance Embedding Learning

Wenbin Ge<sup>1,\*</sup>, Xiankai Lu<sup>2,\*†</sup>, Jianbing Shen<sup>3,1</sup>

<sup>1</sup> Beijing Institute of Technology   <sup>2</sup> School of Software, Shandong University   <sup>3</sup> Inception Institute of Artificial Intelligence  
gewenbin292@bit.edu.cn, carrierlxk@gmail.com

## 1. Results on YouTube-VOS 2019 validation dataset

We report complete results of our proposed method on YouTube-VOS 2019 validation dataset [4]. Table 1 shows results of STM [2], LWL [1] and our proposed method.

|        |                             | STM [2] | LWL [1]     | Ours_fast | Ours |
|--------|-----------------------------|---------|-------------|-----------|------|
|        | Overall                     | 79.2    | <b>81.0</b> | 79.1      | 80.5 |
| seen   | Mean $\mathcal{J} \uparrow$ | 79.6    | <b>79.6</b> | 78.2      | 79.5 |
|        | Mean $\mathcal{F} \uparrow$ | 83.6    | <b>83.8</b> | 82.3      | 83.6 |
| unseen | Mean $\mathcal{J} \uparrow$ | 73.0    | <b>76.4</b> | 73.8      | 76.0 |
|        | Mean $\mathcal{F} \uparrow$ | 80.6    | <b>84.2</b> | 82.1      | 82.9 |

Table 1: **Evaluation of O-VOS on Youtube-VOS<sub>19</sub> val set**, with region similarity  $\mathcal{J}$  and boundary accuracy  $\mathcal{F}$ . “Overall”: averaged over the four metrics.

## 2. Visualization

We present a qualitative evaluation of our proposed method on each sequence of DAVIS<sub>17</sub> val dataset [3], DAVIS<sub>17</sub> test-dev dataset [3] and Youtube-VOS val dataset [4] including Youtube-VOS<sub>18</sub> and Youtube-VOS<sub>19</sub>. Specifically, Figure. 1 shows the visualization results of Ours on DAVIS<sub>17</sub> val dataset [3]. Figure. 2 shows the visualization results of Ours\_fast on DAVIS<sub>17</sub> val dataset [3]. Figure. 3 shows the visualization results of Ours on DAVIS<sub>17</sub> test-dev dataset [3]. Figure. 4 shows the visualization results of Ours\_fast on DAVIS<sub>17</sub> test-dev dataset [3]. Figure. 5 shows the visualization results of Ours on Youtube-VOS val dataset [4]. Figure. 6 shows the visualization results of Ours\_fast on Youtube-VOS val dataset [4].

## References

- [1] Goutam Bhat, Felix Jremo Lawin, Martin Danelljan, Andreas Robinson, Michael Felsberg, Luc Van Gool, and Radu Timofte. Learning what to learn for video object segmentation. In *ECCV*, 2020. 1

- [2] Seoung Wug Oh, Joon-Young Lee, Ning Xu, and Seon Joo Kim. Video object segmentation using space-time memory networks. In *ICCV*, 2019. 1
- [3] Jordi Pont-Tuset, Federico Perazzi, Sergi Caelles, Pablo Arbeláez, Alex Sorkine-Hornung, and Luc Van Gool. The 2017 davis challenge on video object segmentation. *arXiv preprint arXiv:1704.00675*, 2017. 1, 2, 3
- [4] Ning Xu, Linjie Yang, Yuchen Fan, Jianchao Yang, Dingcheng Yue, Yuchen Liang, Brian Price, Scott Cohen, and Thomas Huang. Youtube-vos: Sequence-to-sequence video object segmentation. In *ECCV*, 2018. 1, 4

\*The first two authors contribute equally to this work.

†Corresponding author: Xiankai Lu.

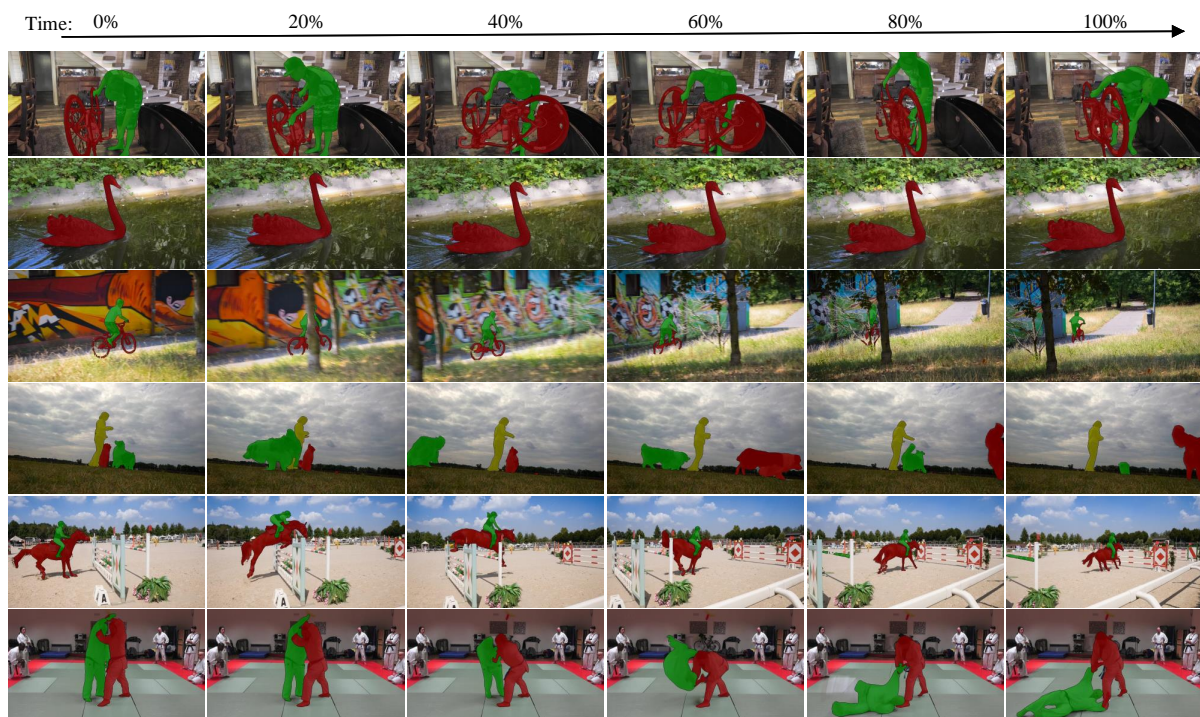

Figure 1: Qualitative results of Ours on DAVIS<sub>17</sub> val dataset [3]. From top to bottom are *bike-packing*, *blackswan*, *bm-x-trees*, *dogs-jump*, *horsejump-high* and *judo*.

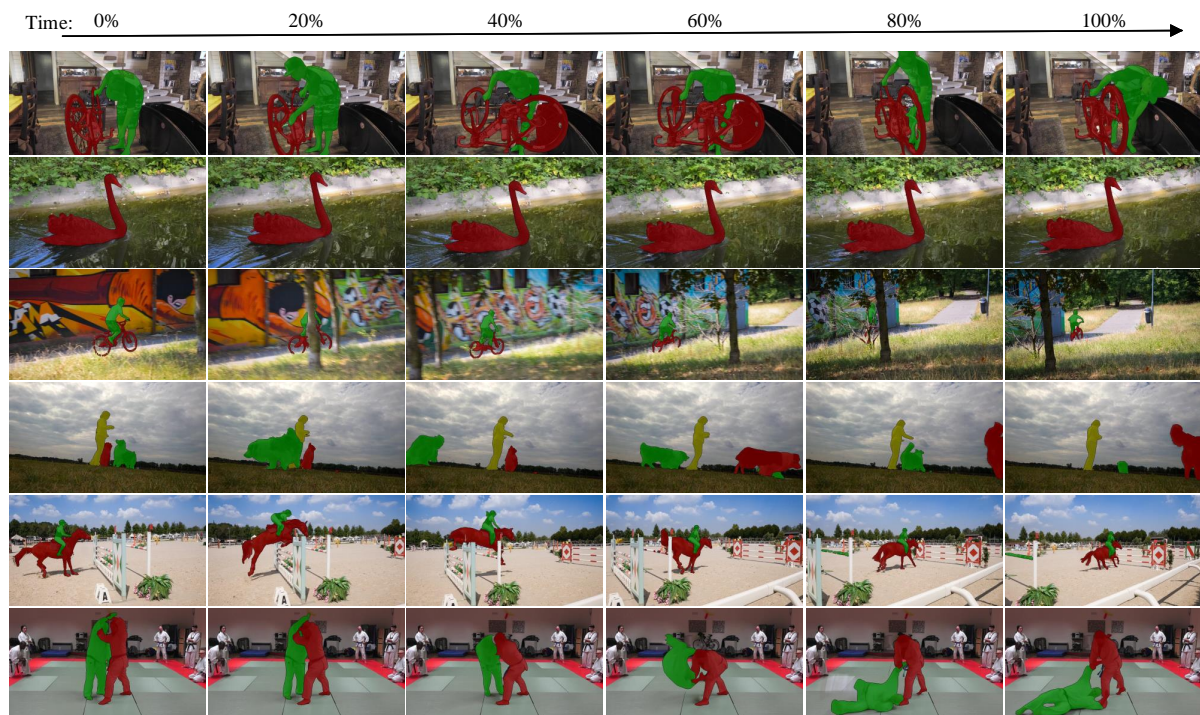

Figure 2: Qualitative results of Ours<sub>fast</sub> on DAVIS<sub>17</sub> val dataset [3]. From top to bottom are *bike-packing*, *blackswan*, *bm-x-trees*, *dogs-jump*, *horsejump-high* and *judo*.



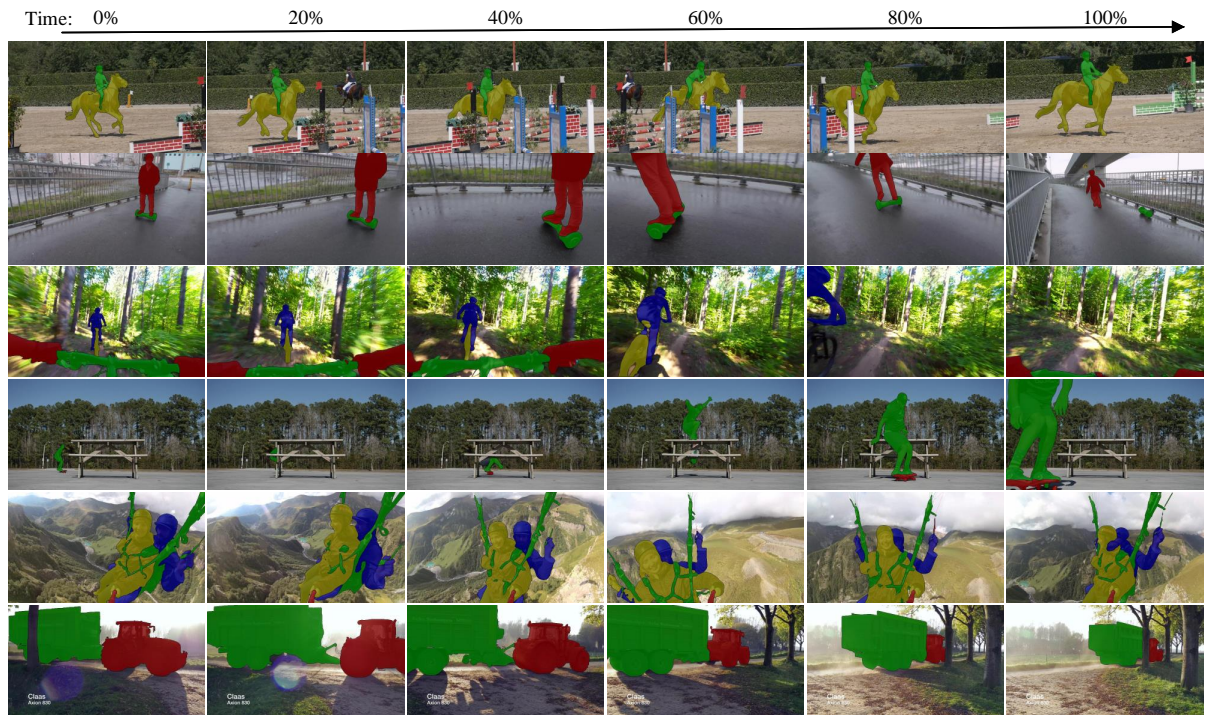

Figure 3: Qualitative results of Ours on DAVIS<sub>17</sub> test-dev dataset [3]. From top to bottom are *horsejump-stick*, *hoverboard*, *mtb-race*, *skate-jump*, *tandem* and *tractor*.

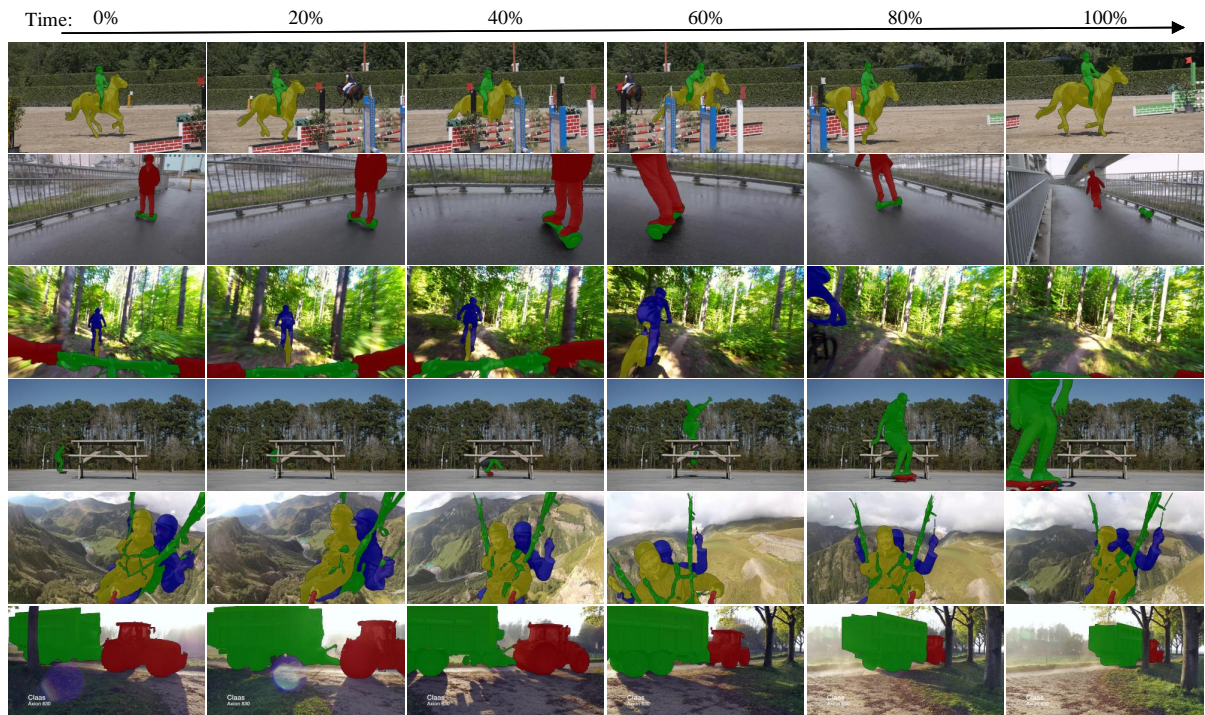

Figure 4: Qualitative results of Ours.fast on DAVIS<sub>17</sub> test-dev dataset [3]. From top to bottom are *horsejump-stick*, *hoverboard*, *mtb-race*, *skate-jump*, *tandem* and *tractor*.



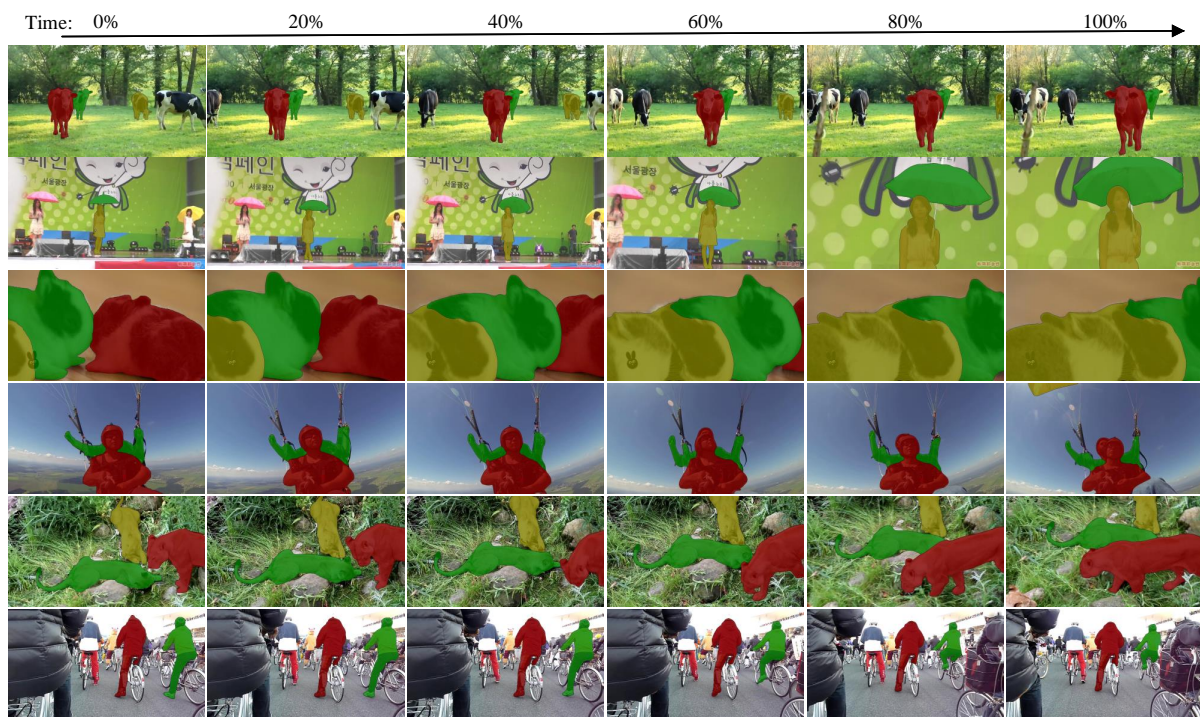

Figure 5: Qualitative results of Ours on Youtube-VOS val dataset [4]. From top to bottom are 3dd327ab4e, 45d898acc4, 63ca8970d9, 83a5056a16, 193aa74f36 and 3674b2c70a.

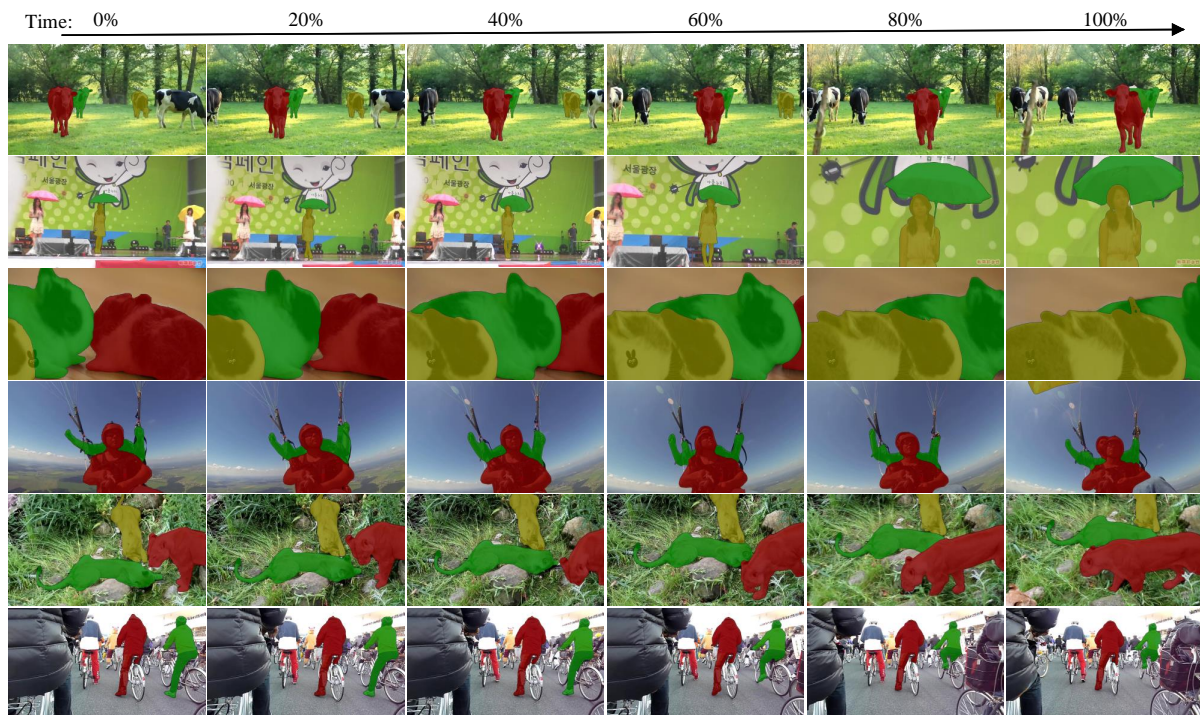

Figure 6: Qualitative results of Ours\_fast on Youtube-VOS val dataset [4]. From top to bottom are 3dd327ab4e, 45d898acc4, 63ca8970d9, 83a5056a16, 193aa74f36 and 3674b2c70a.
